# Supplementary material
Source: Research Square preprint supplement (doi:10.21203/rs.3.rs-8229046/v1)
Supplement: Supplementary file 1 [file 3e0030224dbd4401b4b0f930.pdf]

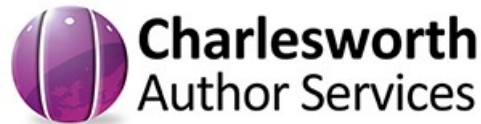

# EDITORIAL CERTIFICATE

This document certifies that the manuscript below was edited for correct English language usage, grammar, punctuation and spelling by qualified native English speaking editors at Charlesworth Author Services.

## **Paper Title:**

Prostate Cancer Aggressiveness Assessment: A Combined Analysis of Prostate MRI and 2.5D Deep Learning Models

## **Author:**

yalei wang

## **Date certificate issued:**

December 03, 2024

[cauthors.com](http://cauthors.com)
